# Supplementary material
Source: PubMed Central journal article supplement (PMC3251057)
Supplement: 1100273108_pnas.201100273SI.pdf [file 1100273108_pnas.201100273SI.pdf]

# Supporting Information

Coufal et al. 10.1073/pnas.1100273108

## SI Methods

**Animals.** Long interspersed element-1-enhanced green fluorescent protein (L1-EGFP) transgenic animals have been previously described (1). Ataxia telangiectasia mutated (ATM) knockout (KO) mice were kindly provided by Carolee Barlow (independent consultant) (2). The L1-EGFP transgene was incorporated into the ATM KO background by crossing L1-EGFP males to ATM<sup>+/-</sup> females. L1-EGFP ATM<sup>+/-</sup> females were then crossed with ATM<sup>+/-</sup> males. The L1-EGFP transgene consists of a human full-length retrotransposition-competent L1<sub>RP</sub> element tagged with a *mEGFP* retrotransposition indicator cassette (3). To analyze L1 retrotransposition in ATM<sup>+/-</sup> mice, six aged-matched male mice from the same C57BL/6J background were used per group. Quantification of EGFP-positive cells in whole-brain slices was done by individuals blinded to mouse genotypes. EGFP-positive cells were counted in a one-in-six series of sections (~240 μm apart). Images were taken by a z-step of 1 μm using a Bio-Rad Radiance 2100 confocal microscope. All experimental procedures and protocols were approved by the Animal Care and Use Committee of The Salk Institute and University of California San Diego.

Primers used for genotyping were as follows. To analyze the L1 transgene, Fw (GCACCATCTTCTTCAAGGAC) and Rv (TCT-TTGCTCAGGGCGGACTC) were used. A 1,243-bp band indicates the L1 transgene with intron, and a 343-bp product from tail genomic DNA indicates a germ line or early embryonic insertion event. To determine ATM allele status, the primers Fw (GACT-TCTGTCAGATGTTGCTGCC), Rv (CGAATTTGCAGGAG-TTGCTGAG), and Neo (GGGTGGGATTAGATAAATGCCTG) were used. The wild-type allele amplifies a 162-bp product, whereas the neomycin insertion transgene is a 441-bp product; cycling conditions were as previously described (2).

Adult animals (4–5 wk old) were killed with an overdose of anesthetics (a mixture of 75 mg/kg ketamine, 10 mg/mL rompun, and 5.6 mg/kg acepromazine) and perfused transcardially with cold 4% paraformaldehyde in phosphate buffer (0.1 M, pH 7.4). The brains and other organs were removed and stored in the fixative overnight. Next, the organs were transferred into 30% sucrose and cut after an additional 48 h. Brains were cut coronally (40 μm) on a sliding microtome from a dry ice-cooled block. Sections were stored at –20 °C in cryoprotectant containing 25% ethylene glycol, 25% glycerin, and 0.05 M phosphate buffer. For immunofluorescence, tissue sections were washed three times in Tris buffered saline (TBS) and blocked for 1 h at room temperature. Primary antibodies were applied in TBS with 3% donkey serum and 0.3% Triton X-100 overnight at 4 °C. Sections were then washed in TBS, blocked for an additional hour, and incubated with the secondary antibodies for 2 h at room temperature before mounting. Antibody dilutions were used as described below (immunofluorescence and immunoblotting). Images were taken by a z-step of 1 μm using a Bio-Rad Radiance 2100 confocal microscope.

**Plasmid DNA Constructs. small hairpin RNA vectors.** siRNAs were commercially available and purchased from Invitrogen. siRNAs were transfected into human embryonic stem cells (hESCs) using the Amaxa electroporation system, nucleofector solution V, and program A-24. Cells were harvested at 3 d for Western blotting. Once specific siRNAs were confirmed to decrease ATM expression, shRNAs were constructed using 70-bp oligonucleotides matching the siRNAs along with complementary oligos (all purchased from IDT) and annealed by boiling and slow cooling.

Annealed products were cloned into the lentiviral pDEST backbone (Invitrogen) and confirmed by sequencing.

Hairpin sequences were as follows, with the control being a scrambled sequence that would form a hairpin: ATM1 (GCAACATTTCCTATATACGCAATTTTCGAATTGCTGATATAGGCAAATGTTGCGGTG), ATM2 (GCGCAGTGTAGCTACTTCTTCTATTTTCGAATAGAAGAAGTAGCTACACGCGCGGTG), and ATM3 (GCACTGACCTCTGTGACTTTTCGAAGTCACAGAGGTCAGTGCGGTG).

**Long interspersed element-1 vectors.** Cloning strategies are available upon request. All long interspersed element-1 (LINE-1) vectors were constructed using a modified version of pCEP4 (Invitrogen) that lacks the CMV promoter and contains a puromycin resistance gene instead of a hygromycin selection gene (3) unless otherwise indicated. DNA superhelicity was confirmed by electrophoresis on 0.7% agarose–ethidium bromide gels, and only highly supercoiled preparations of DNA (>90%) were used in transfection experiments.

L1 plasmid constructs: *cpL1.3mEGFP* (referred to as L1.3-EGFP) contains an 8.7-kb NotI-BamHI fragment containing a full-length L1.3 element (4, 5) and a *mEGFP* retrotransposition indicator cassette (3).

*cpL1.3D205AmEGFP* (referred to as L1.3-D205A-EGFP) is a derivative of *cpL1.3mEGFP* that contains a missense mutation (Asp205Ala) in the endonuclease domain of ORF2 (introducing an FspI restriction site) (5).

*cpL1.3H230AmEGFP* (referred to as L1.3-H230A-EGFP) is a derivative of *cpL1.3mEGFP* that contains a missense mutation (His230Ala) in the endonuclease domain of ORF2 (introducing an NheI restriction site) (5).

*cpL1.3D702AmEGFP* (referred to as L1.3-D702A-EGFP) is a derivative of *cpL1.3mEGFP* that contains a missense mutation (Asp702Ala) in the reverse transcriptase domain of ORF2 (introducing a PvuII restriction site) (5).

*cpL1.3RR261-62AmEGFP* (referred to as L1.3-JM111-EGFP) is a derivative of *cpL1.3mEGFP* that contains two missense mutations (ArgArg261-62AlaAla) in the RNA-binding domain of the ORF1-encoded protein (3, 6).

*cpLRE3mEGFP* (referred to as LRE3-EGFP) has been described previously (7). It contains an 8.7-kb NotI-BamHI fragment containing a full-length LRE3 element (8) and a *mEGFP* retrotransposition indicator cassette (3).

*cpLRE3H230AmEGFP* (referred to as LRE3-H230A-EGFP) is a derivative of *cpLRE3mEGFP* that contains a missense mutation (His230Ala) in the endonuclease domain of ORF2 (introducing an NheI restriction site).

*cpL1RPRR261-62AmEGFP* (referred to as L1RP-JM111-EGFP) has been described previously (3, 6). Briefly, it contains a full-length human L1RP element (9) that contains two missense mutations (ArgArg261-62AlaAla) in the RNA-binding domain of the ORF1-encoded protein.

*cpLRE3\*mEGFP* (referred to as LRE3\*-EGFP) contains an 8.7-kb NotI-BamHI fragment containing a full-length LRE3 element (8) and a *mEGFP* retrotransposition indicator cassette (3). The *Bam*H1 site in ORF2 had been silently mutated. *cpLRE3\*-B1-mEGFP* (referred to as LRE3\*B1-EGFP) is a derivative of *cpLRE3\*mEGFP* that contains a 500-bp *ColE1* sequence (10) between the *mEGFP* cassette and the SV40 polyadenylation signal from the modified pCEP4.

*cpLRE3\*-B2-mEGFP* (referred to as LRE3\*B2-EGFP) is a derivative of *cpLRE3\*-B1-mEGFP* that contains two 500-bp

ColE1 sequences cloned between the mEGFP1 cassette and the SV40 polyadenylation signal from the modified pCEP4.

ColE1 was amplified by PCR with the primers Fw: (GCGG-TAATACGGTTATCCACAGAA) and Rv: (TCAATCTAAA-GTATATATGAGTA), which were flanked by either BamHI sites and a restriction site for SfiI or by two SfiI sites. The first ColE1 copy was introduced using the BamHI site; the second ColE1 was introduced by way of the introduced SfiI site into *cpLRE3\*-B1-mEGFP1*.

Luciferase constructs: *pGL3-L1-5' UTR* has been described previously (1, 7, 11). It contains the 900-bp 5' UTR promoter region of a human L1.3 element (4) cloned in vector pGL3-basic (Promega).

*pGL3-synapsin1* has been described previously (7). It contains the 526-bp synapsin-1 promoter region (a kind gift from G. Thiel, University of Cologne, Germany) cloned in pGL3-basic (Promega).

**Luciferase Assays.** Luciferase assays were performed as previously described (7). Luciferase activity was measured with the Dual-Luciferase reporter assay system according to instructions provided by the manufacturer (Promega). In all assays, a plasmid expressing the Renilla luciferase gene was used as an internal control. The assays were replicated independently at least three times.

**Ribonucleoprotein Particle Isolation and Western Blot Analysis.** Ribonucleoprotein particles (RNPs) were isolated and analyzed as previously described (12). Briefly, hESCs or neural progenitor cells (NPCs) were harvested and lysed as previously described with 1 mL of 1.5 mM KCl, 2.5 mM MgCl<sub>2</sub>, 5 mM Tris-HCl (pH 7.4), 1% deoxycholic acid, 1% Triton X-100, and 1× Complete Mini EDTA-free Protease Inhibitor mixture (Roche) (12). Cell debris was removed by centrifugation at 3,000 × *g* at 4 °C for 5 min, and 10% of the supernatant fraction was saved [i.e., the whole-cell lysate (WCL) fraction]. A sucrose cushion then was prepared with 8.5% and 17% wt/vol sucrose in 80 mM NaCl, 5 mM MgCl<sub>2</sub>, 20 mM Tris-HCl (pH 7.5), and 1 mM DTT, which was supplemented with 1× Complete Mini EDTA-free Protease Inhibitor mixture (Roche). WCLs were centrifuged at 39,000 × *g* for 2 h at 4 °C using a Sorvall SW-41 rotor. After centrifugation, the pelleted material (i.e., the RNP sample) was resuspended in 50 μL of purified water supplemented with 1× Complete Mini EDTA-free protease inhibitor mixture (Roche). Total protein concentration was determined by Bradford assay according to instructions provided by the manufacturer (Bio-Rad). WCL and/or RNP samples (8 μg of each sample) were loaded on 10% SDS/PAGE gels (Bio-Rad). Antibodies and dilutions were as follows: anti-ORF1, rabbit polyclonal antibody, 1:10,000 dilution (a generous gift from Thomas Fanning, National Institutes of Health, Bethesda, MD); anti-S6 ribosomal protein, rabbit polyclonal antibody, 1:1,000 dilution (Cell Signaling); and anti-Sox1, goat polyclonal, 1:500 dilution (R&D). All HRP-conjugated secondary antibodies were used at a 1:20,000 dilution (Abcam).

Western blotting was carried out using standard protocols. Protein concentrations were estimated by performing Lowry Assays (Bio-Rad), and 30 μg of protein was loaded per well. The following antibodies were used at the indicated dilutions: rabbit anti-ATM (1:2,500) (Epitomics); rabbit anti-actin (1:5,000) (Sigma), and rabbit anti-Sox2 (1:5,000) (Chemicon). All secondary antibodies were purchased from Jackson ImmunoResearch.

**Cell Culture, Transfection, and Analysis.** NPCs were derived from hESCs as previously described (7, 13). NPCs were transfected by nucleofection (Amaxa Biosystems) and either maintained as progenitors in the presence of fibroblast growth factor 2 (FGF2) or differentiated as previously described (7).

The hESC line HUES6 was cultured as previously described (<http://www.mcb.harvard.edu/melton/HUES/>) (7, 14). Under our experimental conditions, both control and ATM-deficient hESCs exhibited a grossly normal karyotype, as did derived NPCs (Fig. S3). Briefly, cells were grown on Matrigel-coated plates (BD Biosciences) in DMEM media (Invitrogen) supplemented with 20% KO serum replacement, 1 mM L-glutamine, 50 μM β-mercaptoethanol, 0.1 mM nonessential amino acids, and 10 ng/mL FGF2. The cells were passaged by a combination of manual dissection using the StemPro EZPassage passaging tool (Invitrogen) and a brief treatment with trypsin.

Lentiviral virus-like particles were produced as previously described (15). Briefly, recombinant lentiviruses were produced by transient transfection of HEK293T with three packaging vectors in addition to the pDEST shRNA vector. The control virus used is pDEST, which contains a shRNA toward a scrambled target sequence. Infectious media were harvested, filtered, and concentrated by ultracentrifugation. Efficacy of lentivirus was tested by infection of HUES6 hESCs at varying viral concentrations and subsequently by Western blotting.

The hESCs were passaged by a combination of manual dissection and trypsin and subsequently washed in PBS. A suspension of single cells was collected in a microcentrifuge tube and briefly centrifuged, and all but 20 μL PBS was removed. Ten microliters of high-titer lentivirus was added and mixed with the hESCs. The cells were incubated for 20–30 min at 37 °C and subsequently plated in hESC media. Once cells had recovered (at ~1 wk), they were plated at low density to a 10-cm plate. Post infection, cells were selected with 2 μg/mL blasticidin beginning 4 d after infection and lasting for a minimum of 10 d. Thereafter, single colonies were manually selected. These colonies were grown and later tested by Western blot analysis for expression of ATM. Thirty colonies were selected for each ATM and control shRNA, and 15 that exhibited robust growth and normal hESC colony morphology were tested by Western blot analysis for expression of SOX2 and ATM. More than 90% of ATM shRNA-infected colonies exhibited robust knockdown of ATM. Three to five lines with robust ATM knockdown were selected for each shRNA construct and for control, were tested to confirm normal karyotype, and were differentiated to NPCs. Those with the best differentiation were selected for further analysis, were two control lines. hESCs were reselected with blasticidin after every three passages.

For embryoid body (EB) formation, cells were grown to large colony size and then manually scraped. They were then grown for 7 d in DMEM-F12 Glutamax media (Invitrogen) with N2 supplement (Gibco) and 500 ng/mL Noggin (Fitzgerald) in non-adherent petri dishes. The resulting EBs were plated onto laminin/polyornithine (Sigma)-coated plates and were grown for 7–10 d. Rosettes were manually dissected and dissociated in 0.1% trypsin and plated in DMEM-F12 media supplemented with N2 and B-27, 1 μg/mL laminin, and 20 ng/mL FGF2. The resulting NPCs could be maintained for multiple passages before the induction of differentiation. Differentiation conditions involved the withdrawal of mitogens and treatment of the cells with 20 ng/mL of brain-derived neurotrophic factors, 20 ng/mL of glia-derived neurotrophic factors (Peprotech), 1 mM di-butyl-yl-cyclicAMP (Sigma), and 200 nm of ascorbic acid (Sigma) for 4–12 wk.

HUES6-derived NPCs and human fetal neural progenitor cells (hCNS-SCNs) were transfected by nucleofection using the Amaxa rat neural stem cell (NSC) nucleofactor solution and program A-31. The transfection efficiency was determined by using cells transfected with an EGFP plasmid and analyzed 2 d post transfection by FACS analysis. The transfection efficiency ranged from 50 to 80% for hESC-derived NPCs and from 50 to 70% for hCNS-SCNs. Cells were cultured as progenitors in the presence of mitogens. For differentiation studies, cells were dissociated and plated for differentiation 8–10 d after the initial

transfection. Cells were monitored for EGFP expression by fluorescence microscopy. For FACS analysis, cells were dissociated and analyzed on a Becton-Dickinson LSR I in the presence of 1  $\mu\text{g}/\text{mL}$  propidium iodide for live/dead cell gating. All assays were performed in triplicate. JM111-EGFP transfected cells were used as a negative control for gating purposes. Silencing of EGFP expression was determined by addition of either the HDAC inhibitor 500 nM trichostatin-A or the de novo DNA methyltransferase inhibitor 5' azacytidine at 500 ng/mL for 24 h on day 8 post transfection.

The HCT116 cell line, a colon carcinoma cell line (ATCC), was grown as previously described (16). In brief, cells were cultured in DMEM supplemented with 10% FBS and 1.5 mM L-glutamine. They were passaged with 0.1% trypsin treatment. HCT116 lines deficient in nonhomologous end-joining genes (DNA-PK $_{cs}^{-/-}$ , DNA ligase IV $^{-/-}$ , and XLF $^{-/-}$ ) were a kind gift from Matthew Weitzman (The Salk Institute, La Jolla, CA). ATM-deficient HCT116 lines were made by plating HCT116 or HCT116 p53 $^{-/-}$  cells at low density (20%) in a six-well plate and then infecting overnight with 5  $\mu\text{L}$  of high-titer lentivirus (ATM shRNA or control shRNA) in 1 mL of media. Cells were subsequently replated at low density to a 10-cm dish, and single colonies were selected for expression analysis and further experiments. Infection efficiency was >85% with a GFP-containing lentivirus. The dominant-negative p53 (DNp53) construct was a kind gift from Geoffrey Wahl (The Salk Institute, La Jolla, CA). The ATR and Mre11 shRNA plasmids in the shUpf1 plasmid were a kind gift from Matthew Weitzman. The BRCA1 shRNA in the pGEM-T plasmid was a kind gift from Inder Verma (The Salk Institute, La Jolla, CA). For BRCA1, ATR, and MRE11 shRNA experiments and for experiments using the DNp53, HCT116 cells were plated in six-well plates and then transfected the following day using Lipofectamine (Invitrogen) per the manufacturer's protocol. For RT-PCR experiments, cells were harvested 3 d post transfection. For L1 retrotransposition assays, cells were transfected again 2 d after the initial transfection with the L1 plasmids and then assayed 5 d later for L1-EGFP expression.

The hCNS-SCns lines were cultured as previously described and were a kind gift from Stem Cells (Palo Alto, CA) (7, 17). hCNS-SCns cells were derived from fetal brain by FACS using the cell-surface markers (CD133) $^{+}$ , (5E12) $^{+}$ , (CD34) $^{-}$ , (CD45), and CD24 $^{-/\text{lo}}$ . This combination of markers enriches for progenitor neurosphere-initiating cells capable of differentiating into cells of both the neuronal and glial lineages (17). The hCNS-SCns cells were cultured in X-Vivo 15 media (Lonza BioScience) supplemented with 20 ng/mL FGF2, 20 ng/mL epidermal growth factor, 10 ng/mL leukemia inhibitor factor, N2 supplement, 0.2 mg/mL heparin, and 60  $\mu\text{g}/\text{mL}$  N-acetylcysteine.

Karyotype analysis was performed by Cell Line Genetics and also performed in-house as previously described (18). Briefly, cells were incubated overnight in demecolcine solution (#D1925; Sigma) at 10 ng/mL and then harvested in EDTA/Versine with the slow addition of 75 mM KCL. Cells were incubated and then fixed with the addition of a 3:1 methanol:glacial acetic acid solution. Cells were then spread on a slide, rapidly flame dried, and stained with Vectashield with DAPI (Vector Laboratories). Chromosome spreads were identified using fluorescent microscopy, photographed, and quantified.

Cell cycle staining was performed as previously described (19, 20). Briefly, cells were trypsinized, washed, and resuspended in PBS buffer and then fixed by addition of a 3:1 ratio of ice-cold 100% ethanol in PBS overnight at  $-20^{\circ}\text{C}$ . Subsequently, cells were washed and resuspended in a solution containing 50  $\mu\text{g}/\text{mL}$  propidium iodide and 500 ng/mL RNase A for 1 h at  $37^{\circ}\text{C}$  before analysis by FACS on a Becton-Dickinson FACScan.

**Electrophysiology.** ATM and control shRNA-infected HUES6-hESCs were differentiated to neural rosettes; the best rosettes were

manually selected and dissociated, grown for a single passage as NPCs, electroporated with the LRE3-EGFP plasmid, allowed to proliferate for 8 additional days, and subsequently differentiated, as previously described (7). Whole-cell perforated patch recordings were performed on EGFP-expressing cells after 12–13 wk of differentiation. The recording micropipettes (tip resistance 3–6 M $\Omega$ ) were tip-filled with internal solution composed of 115 mM K-gluconate, 4 mM NaCl, 1.5 mM MgCl $_2$ , 20 mM Hepes, and 0.5 mM EGTA (pH 7.4) and then backfilled with the same internal solution containing 200  $\mu\text{g}/\text{mL}$  amphotericin. Recordings were made using an Axopatch 200B amplifier (Axon Instruments). Signals were sampled and filtered at 10 and 2 kHz, respectively. The whole-cell capacitance was fully compensated, whereas the series resistance was uncompensated but monitored during the experiment by the amplitude of the capacitive current in response to a 5-mV pulse. The bath was constantly perfused with fresh Hepes-buffered saline composed of 115 mM NaCl, 2 mM KCl, 10 mM Hepes, 3 mM CaCl $_2$ , 10 mM glucose, and 1.5 mM MgCl $_2$  (pH 7.4). For current-clamp recordings, cells were clamped between  $-60$  to  $-80$  mV. For voltage-clamp recordings, cells were clamped at  $-70$  mV. All recordings were performed at room temperature. Amphotericin B was purchased from Calbiochem. All other chemicals were from Sigma.

**PCR and RT-PCR.** Adult human tissues from patients with ataxia telangiectasia (AT) and age- and sex-matched controls ( $n = 7$  for each group) were obtained from the National Institutes of Child Health & Human Development (NICHD) Brain and Tissue Bank for Developmental Disorders (University of Maryland, Baltimore). Experiments were performed on an ABI Prism 7000 sequence detection system (Applied Biosystems). Whole-genome size was estimated using the following equation: cell genomic DNA content =  $3 \times 10^9$  (# bp)  $\times$  2(diploid)  $\times$  660 (molecular weight 1 bp)  $\times$   $1.67 \times 10^{12}$  (weight 1 Da), resulting in the approximation that one cell contains 6.6 pg genomic DNA (21). For each tissue, 10- $\mu\text{m}$  sections were generated and stained for neuronal nuclei (NeuN) (1:100). For each tissue, 100 cells were laser captured on an Arcturus PixCell IIE Laser Capture Microdissection Instrument, and the genomic DNA was extracted using the PicoPure DNA Extraction Kit, according to the manufacturer's instructions, with triplicate identical laser capture samples. The genomic DNA from 100 cells was resuspended in 50  $\mu\text{L}$ , and 5  $\mu\text{L}$  was used per genomic DNA qPCR reaction, which is equivalent to 10 cells per reaction and comparable to the 12 cells/reaction used in previous studies (7, 18).

Oligonucleotide PCR primers were purchased from Allele Biotech and TaqMan-MGB probes were obtained from Applied Biosystems and were designed using Primer Express software (Applied Biosystems). L1 primers were verified using the L1 database (<http://l1base.molgen.mpg.de/>) and matched a minimum of 140 of 145 full-length L1s with two intact ORFs in the database.

Quantitative PCR experiments were performed using an ABI Prism 7000 sequence detection system and Taqman Gene Expression Mastermix (Applied Biosystems). Data analysis was performed with SDS 2.3 software (Applied Biosystems). The multiplexing reaction was optimized by limiting reaction components until both reactions amplified as well as each individual reaction. Standard curves of genomic DNA ranging from 2 ng to 16 pg were performed to verify that the  $\sim 70$ -pg dilution used was within the linear range of the reaction. Primer efficiency and multiplexing effectiveness were verified by linear regression to the standard curve and indicated a slope near  $-3.32$ , representing acceptable amplification of both PCR products and matched primer efficiencies. ORF2 probes were conjugated to the fluorophore label VIC, and all other probes were conjugated with 6FAM. For the control assay depicted in Fig. 5E (HERVH/SATA), the HERVH probe was generated with the VIC fluorophore to multiplex with the SATA-6FAM probe set. Copy numbers were

determined using the University of California at Santa Cruz genome browser in silico PCR function, and the primers and probes used were the following: primers (7)—HERVH (99 copies), probe (5'-CCCTTCGCTGACTCTC-3'), Fw (5'-AATGGCC-CACCCCTATCT-3'), and Rv (5'-GCGGGCTGAGTCCGAAA-3'); 5S RNA (35 copies), probe (5'-AGGGTCGGCCTGG-3'), Fw (5'-CTCGTCTGATCTCGGAAGCTAAG-3'), and Rv (5'-GCGGTCTCCATCCAAGTAC-3'); SATA [millions of copies (22)], probe (5'-TCTTTCGTTTCAAACTAG-3'), Fw (5'-GGT-CAATGGCAGAAAAGGAAAT-3'), and Rv (5'-CGCAGTTT-GTGGGAATGATTC-3'); L1 ORF2 (4,560 copies), probe (5'-CTGTAACACTAGTTCAACCATT-3'), Fw (5'-TGCGGAGAA-ATAGGAACACTTTT-3'), and Rv (5'-TGAGGAATCGCCA-CACTGACT-3').

Copy-number estimates are based on previously described methodologies (7). The increase in L1 ORF2 genomic DNA content is 2–3% in AT patients compared with controls. First, the L1 ORF2 primers described above match ~4,500 copies of L1 in the human genome according to the University of California at Santa Cruz genome browser. Therefore, an increase of 2% would be equivalent to ~90 copies of L1 per hippocampal neuronal genome. Second, we have previously published spiking experiments (7) in which we spiked a calculated copy number of L1 plasmid into somatic tissue to measure the quantity required to increase the somatic tissue to the L1 copy-number level of hippocampal tissue. We calculated an increase of ~80 L1 copies per hippocampal genome with a concomitant increase of 3–7% in the quantity of genomic L1 DNA in the qPCR assay. The spiked L1 copies were in the form of a plasmid, which likely affects the copy-number estimates, providing an estimate of relative change and imprecise quantification of the absolute number of L1s per cell. On the basis of this estimate, the increase of 2% that we find in AT patients compared with control would be equivalent to ~50 copies per hippocampal neuron.

Genomic DNA from transfected ATM-deficient and control NPCs was isolated using the DNeasy Blood and Tissue kit according to instructions provided by the manufacturer (Qiagen). Genomic DNA was collected 10 d post transfection from NPCs. To assay for removal of the intron from the retrotransposition indicator cassette, 200 ng of genomic DNA was used in a 25- $\mu$ L PCR with the primers EGFP968s and EGFP1013as. PCR cycling conditions were described previously (3, 6). The marker ladder used in all gel pictures is a 1-kb plus ladder (Invitrogen, catalog #10787-081).

Inverse PCR (IPCR) was performed as previously described (7, 23). Briefly, HUES6-derived ATM-deficient and control NPCs were transfected with the native, full-length LRE3 and then allowed to grow for 14 d. The resulting cells were dissociated with trypsin and sorted on a Becton-Dickinson FACScan. A total of 40,000 EGFP-positive cells were sorted for each shRNA. These cells proliferated in culture and, like the EGFP-negative control cultures, expressed the expected neural stem markers (Fig. S7C) and could be differentiated to neuronal and glial lineages at similar rates to control cultures (Fig. S7D). The cells were harvested, and genomic DNA was isolated using standard phenol-chloroform techniques. Briefly, 5–10  $\mu$ g of genomic DNA was digested overnight with either SspI or XbaI. The digested DNA then was ligated under dilute conditions in a final volume of 1 mL with 3,200 U of T4 DNA ligase (New England Biolabs) overnight at 4 °C. The circular ligated DNA was concentrated to 50  $\mu$ L using a Microcon 100 column (Millipore) and then was subjected to IPCR using previously described conditions (7). EGFP primers

utilized: 5'-CTTGAAGAAGATGGTGCG-3' and 5'-ACAAC-CACTACCTGAGCACC-3'. PCR reactions were carried out with the Expand Long kit using buffer system 1 following the manufacturer's directions (Roche). We used a 5- $\mu$ L aliquot from this reaction in a second-round nested PCR using the primers 5'-TTGAAGAAGTCGTGCTGC-3' and 5'-AAAGACCCCAACGAGAAGCG-3'. PCR products were gel-isolated, cloned into the TOPO TA 2.1 plasmid (Invitrogen), and sequenced. Identification of the L1 preintegration sites and other DNA sequence analyses were performed using the University of California at Santa Cruz genome browser (<http://genome.ucsc.edu>; March 2006 assembly) (24).

For RT-PCR, RNA was isolated from various cell and tissue types with RNABee (Tel-Test) following the manufacturer's directions. RNA quality was verified by gel electrophoresis, and cDNA was synthesized using the cells-to-cDNA II kit (Ambion/Applied Biosystems) per manufacturer's instructions. PCR was carried out using Taq Polymerase (Promega). Cycling parameters were as follows: 94 °C for 1 min and then 25 or 30 cycles with the following parameters: 94 °C for 1 min, 50–60 °C for 1 min, and 72 °C for 1 min. RT-PCR analysis was performed using the following primer pairs:

L1—Fw (GCATTACCATTTCAGGACATAGGC) and Rv (GTTCTAGATCCCTGAGGAATCGC); ATM—Fw (ACAA-CCCCTGCAAACCTTGG) and Rv (TCTGGCTCCCCTATA-CTTCTG); ATR—Fw (AAGCCGTTCTCCAGGAATAC) and Rv (ATCTATCGCCCCAATTCCC); p53—Fw (TCCC-CAGCCAAAGAAGAAAC) and Rv (AGTGCAGGCCAAC-TTGTTTC); MRE11—Fw (GAAGAATGTGCAGCTCTC-AC) and Rv (CACTAAAGGCAGAAGCAGAC); BRCA1—Fw (AGTCACTTATGATGGAAGGGTAGC) and Rv (ATC-TGGGTGTGAGAGTGAACAAG); DNA Ligase IV—Fw (TCTGGTTCACAGAGGTAACG) and Rv (TCTGATTT-TTTCTGACGTC); DNAPKcs—Fw (CGAAGAGCAGC-TAGACAACACTAC) and Rv (AGGCATAGTTTGCCTTGA-GC); XLF—Fw (TCAACAGGTGTGGCATGAAC) and Rv (TGCCCATCAGAGGACGAATC); GAPDH—Fw (CATGT-TCGTCATGGGTGTGAACC) and Rv (GGAAATGAGCT-TGACAAAGTGGTC); and EGFP—Fw (GCACCATCTTCT-TCAAGGAC) and Rv (TCTTTGCTCAGGGCGGACTC).

**Immunocytochemistry and Imaging.** Cells were fixed in 4% paraformaldehyde, and immunocytochemistry was performed as previously described (7). Antibodies and dilutions were as follows:  $\beta$ III tubulin, mouse monoclonal, 1:400 or rabbit polyclonal, 1:500 (Babco and Covance); Map (2a+2b), mouse monoclonal, 1:500 (Sigma); glial fibrillary acidic protein (GFAP) rabbit polyclonal, 1:300 (DAKO); GFAP, guinea pig polyclonal, 1:1,000 (Advanced Immunochemical); Nestin, mouse monoclonal, 1:800 (Millipore); tyrosine hydroxylase, rabbit polyclonal, 1:500 (Pel-Freez); Sox2, rabbit polyclonal, 1:500 (Sigma); choline acetyltransferase, rabbit polyclonal, 1:100 (Millipore); EGFP, mouse monoclonal (Molecular Probes and Invitrogen); NeuN, mouse monoclonal, 1:100 (Millipore); GABA rabbit polyclonal, 1:200 (Millipore); synapsin, rabbit polyclonal, 1:50 (Cell Signaling Technology). Secondary antibodies were purchased from Jackson ImmunoResearch or Invitrogen and all were used at 1:250. Cells were imaged using a CARVII spinning disk confocal imaging system (BD).

- Muotri AR, et al. (2005) Somatic mosaicism in neuronal precursor cells mediated by L1 retrotransposition. *Nature* 435:903–910.
- Barlow C, et al. (1996) Atm-deficient mice: A paradigm of ataxia telangiectasia. *Cell* 86(1):159–171.
- Ostertag EM, Prak ET, DeBerardinis RJ, Moran JV, Kazazian HH Jr. (2000) Determination of L1 retrotransposition kinetics in cultured cells. *Nucleic Acids Res* 28:1418–1423.

- Sassaman DM, et al. (1997) Many human L1 elements are capable of retrotransposition. *Nat Genet* 16(1):37–43.
- Wei W, et al. (2001) Human L1 retrotransposition: Cis preference versus trans complementation. *Mol Cell Biol* 21:1429–1439.
- Moran JV, et al. (1996) High frequency retrotransposition in cultured mammalian cells. *Cell* 87:917–927.



















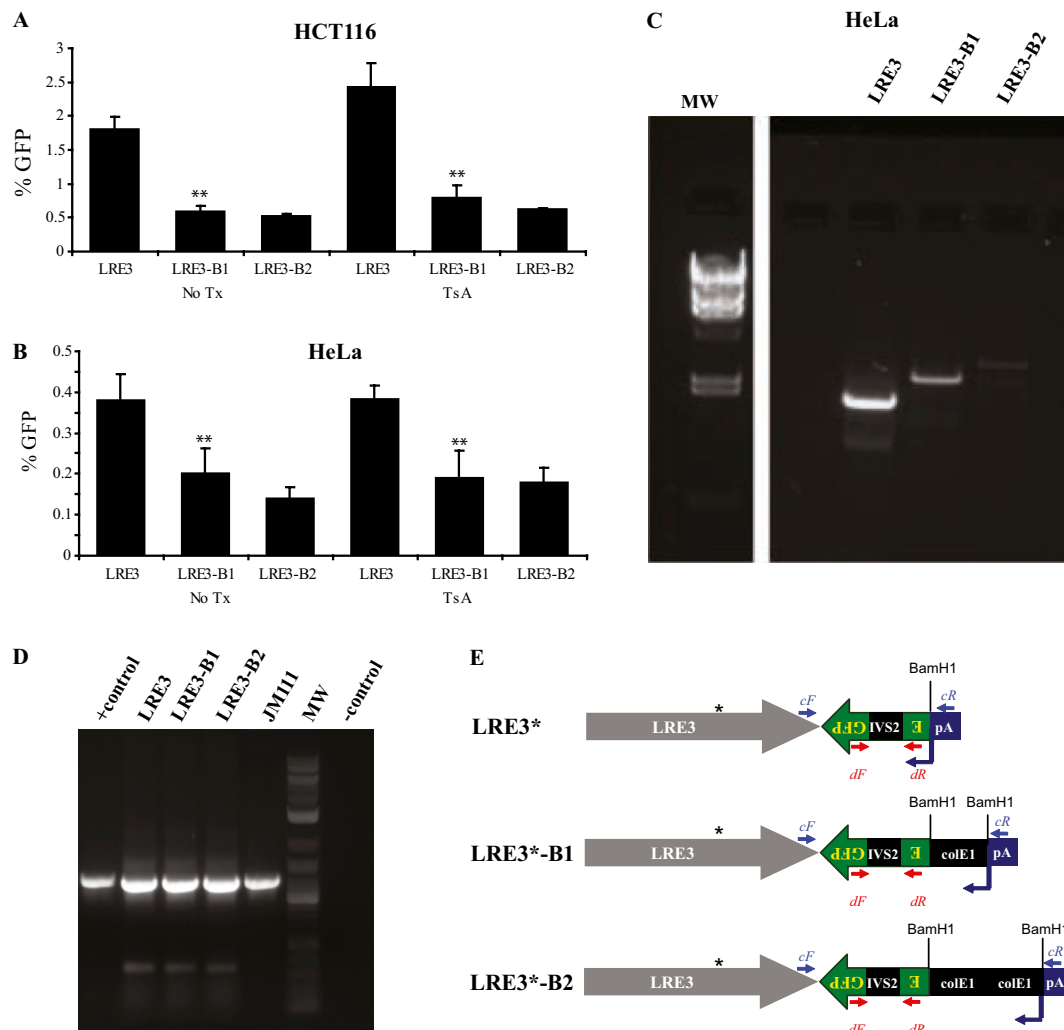

**Fig. S8.** Verification of the LRE3\*-EGFP spacer constructs. HCT116 (A) and HeLa (B) cells showed a dramatic decrease in L1-EGFP expression after 6 d when transfected with constructs containing one (LRE3\*-EGFP-B1) or two (LRE3\*-EGFP-B2) 500-bp ColE1 spacers. In all panels, \*\* $P < 0.01$ . (C) PCR reactions using primers on either side of the indicator cassette (cF and cR in E) with genomic DNA derived from transfected HeLa cells indicates that the resultant products are of the expected size (500-bp increase for each copy of ColE1); top bright band is the vector; lower faint band is the retrotransposed product. (D) PCR reactions using primers that flank the intron in the EGFP cassette (dF and dR in E) with genomic DNA from transfected HeLa cells demonstrated an equally sized EGFP product from all constructs (top bright band is the vector; lower faint band is the retrotransposed product). MW, molecular weight marker. (E) Schematic indicating the placement of primers used for the PCR reactions in C and D. Primers include the forward (cF) and reverse (cR) used in C and the forward (dF) and reverse (dR) used in D. The asterisk (\*) indicates that the parent LRE3 construct has a silent mutation that destroys the BamH1 restriction site in ORF2 (SI Methods). Sequences of the PCR primers are available upon request.

**Table S1. Insertions characterized by inverse PCR**

| shRNA   | Analysis          | 5' sequence* | Poly(A) | EN site       | Locus | L1 insertion target site                                                                                                                                  |
|---------|-------------------|--------------|---------|---------------|-------|-----------------------------------------------------------------------------------------------------------------------------------------------------------|
| Control | Full <sup>†</sup> | 5248         | 75      | 5'-TTGT/AA-3' | 12q23 | 24 kb upstream from SLCA8, solute carrier family 5 (iodide transporter)                                                                                   |
| Control | Partial           | 6228         | >120    | 5'-TTTT/TT-3' | 9p21  | 5 kb upstream from IFNA14, IFN, $\alpha$ -14, and into a LINE element                                                                                     |
| Control | Partial           | 6229         | 76      | 5'-TAAT/AA-3' | 8p22  | 20 kb upstream from NAT1 ( <i>N</i> -acetyltransferase 1), into a LINE element                                                                            |
| ATM1    | Partial           | 6187         | 44      | 5'-TTTT/AA-3' | 1q32  | Into a LINE element                                                                                                                                       |
| ATM1    | Partial           | 6290         | 88      | 5'-ATAT/AA-3' | 12p13 | Into a SINE element                                                                                                                                       |
| ATM1    | Partial           | 6254         | 110     | 5'-TTTT/AA-3' | 1q41  | Into an intron of cDNA FLJ34932 (AK092251) and 20 kb upstream from PROX1                                                                                  |
| ATM1    | Partial           | 5234         | >130    | 5'-TTTT/GT-3' | 9p21  | 5 kb upstream from IFNA14, IFN, $\alpha$ -14, and into a LINE element                                                                                     |
| ATM1    | Partial           | 6263         | 78      | 5'-TTTT/CA-3' | 6q14  | Into an intron of COL12A1, collagen, type XII, $\alpha$ -1 long isoform                                                                                   |
| ATM1    | Partial           | 6195         | 102     | 5'-TTTT/AA-3' | 12q21 | >100 kb from any gene                                                                                                                                     |
| ATM1    | Partial           | 5536         | 54      | 5'-TTTT/GT-3' | 10q21 | Into a LINE element                                                                                                                                       |
| ATM1    | Full <sup>‡</sup> | 5286         | 98      | 5'-TTTT/GT-3' | 4q33  | Into a LINE element                                                                                                                                       |
| ATM1    | Partial           | 6236         | 31      | 5'-TTTT/AT-3' | 4p16  | Into an intron of hypothetical protein LOC152992 isoform 2 (C4orf23) and 20 kb upstream from acyl-CoA oxidase 3, pristanoyl isoform a (peroxidase enzyme) |
| ATM1    | Partial           | 6226         | 22      | 5'-TTTT/CC-3' | 3p13  | Into an intron of PPP4R2 (protein phosphatase 4)                                                                                                          |
| ATM3    | Partial           | 6258         | 53      | 5'-TTTT/GT-3' | 2p24  | Into a LINE element in a region of ESTs                                                                                                                   |
| ATM3    | Full <sup>§</sup> | 5221         | 37      | 5'-TTTT/AA-3' | 6q22  | 80 kb upstream from heparan sulfate (glucosamine)                                                                                                         |
| ATM3    | Partial           | 6018         | 94      | 5'-TTTT/AA-3' | 1q24  | Into an intron of EST <i>Homo sapiens</i> cDNA FLJ39010 fis                                                                                               |

Three insertions from control shRNA-infected HUES6-derived NPCs, as well as 13 from ATM-deficient, HUES6-derived NPCs (10 from ATM1 and 3 from ATM3) were characterized. Of these insertions, three were characterized at both the 5' and 3' ends (one from control, two from ATM-deficient NPCs). The remaining insertions were characterized only on their 3' end. Notably, all insertions occurred in an actual or inferred A/T-rich endonuclease consensus recognition site.

\*For partial insertions, the 5' sequencing site is the farthest into the L1 that was sequenced. For full insertions, this is the truncation site.

<sup>†</sup>A 1-bp deletion.

<sup>‡</sup>No target site duplication, no deletion.

<sup>§</sup>A 127-bp deletion.
